# 1 HUMAN GENES ARE *IN SILICO* POTENTIAL TARGETS FOR RICE 2 miRNA

3

4 Aizhan Rakhmetullina, Anna Pyrkova, Dana Aisina, Anatoliy Ivashchenko

5 <sup>1</sup> Department of Biotechnology, SRI of Biology and Biotechnology Problems, al-Farabi Kazakh  
6 National University, Almaty, al-Farabi 71, Almaty, 050040, Kazakhstan

7

8 ORCID IDs: 0000-0002-0117-7110 (A.K.); 0000-0001-8483-451X (A.P.); 0000-0002-7137-  
9 3408 (D.A.); 0000-0002-7969-2016 (A.I.)

10

11 Address correspondence to [a.iavashchenko@gmail.com](mailto:a.iavashchenko@gmail.com).

12 The author responsible for distribution of materials integral to the findings presented in this  
13 article in accordance with the policy described in the Instructions for Authors  
14 ([www.plantcell.org](http://www.plantcell.org)) is: Anatoliy Ivashchenko ([a.iavashchenko@gmail.com](mailto:a.iavashchenko@gmail.com)).

15

## 16 Abstract

17 **Exogenous miRNAs enter the human body through food, and their effects on metabolic**  
18 **processes can be considerable. It is important to determine which miRNAs from plants**  
19 **affect the expression of human genes and the extent of their influence. The binding sites of**  
20 **738 osa-miRNAs that interact with 17508 mRNAs of human genes were determined using**  
21 **the MirTarget program. The characteristics of the binding of 46 single osa-miRNAs to 86**  
22 **mRNAs of human genes with a value of free energy ( $\Delta G$ ) interaction equal 94% to 100%**  
23 **from maximum  $\Delta G$  were established. The findings showed that osa-miR2102-5p, osa-**  
24 **miR5075-3p, osa-miR2097-5p, osa-miR2919 targeted the largest number of genes at 38, 36,**  
25 **23, 19 sites, respectively. mRNAs of 86 human genes were identified as targets for 93 osa-**  
26 **miRNAs of all family osa-miRNAs with  $\Delta G$  values equal 94% to 98% from maximum  $\Delta G$ .**  
27 **Each miRNA of the osa-miR156-5p, osa-miR164-5p, osa-miR168-5p, osa-miR395-3p, osa-**  
28 **miR396-3p, osa-miR396-5p, osa-miR444-3p, osa-miR529-3p, osa-miR1846-3p, osa-**  
29 **miR2907-3p families had binding sites in mRNAs of several human target genes. The**  
30 **binding sites of osa-miRNAs in mRNAs of the target genes for each family of osa-miRNAs**  
31 **were conserved when compared to flanking nucleotide sequences. mRNA human genes of**  
32 **osa-miRNAs are candidate genes of cancer, cardiovascular and neurodegenerative diseases.**

33

## 34 Introduction

35 Plant miRNA (pl-miR) and animal miRNA (an-miR) are exogenous miRNA or xeno miRNA  
36 (ex-miR or xe-miR) for humans and do not have distinctive features among themselves.  
37 Therefore, in the human body, they will be perceived as the general diversity of the endogenous  
38 miRNA (en-miR) of a human, and all human genes can potentially be their targets. The effect of

39 ex-miR on human target genes and the consequences of this effect will depend on their  
40 concentration and the duration of their presence in the cells. pl-miR can enter the human body  
41 through the gastrointestinal tract and spread with blood in combination with proteins or as part of  
42 exosomes (Buck et al., 2014; Escrevente et al., 2011; Montecalvo et al., 2012; van der Grein &  
43 Nolte-'t Hoen, 2014). Many studies have shown that miRNAs that enter the gastrointestinal tract  
44 with food (dietary miRNA) are then found in various tissues (Chiang et al., 2015; Jonathan et al.,  
45 2013; Liang et al., 2015; Stephen & Snow, 2017; Vaucheret & Chupeau, 2012; Zempleni et al.,  
46 2017; Zhang et al., 2019; Zhang et al., 2012; Zhao et al., 2018). For example, after consumption  
47 of a fresh maize diet most zma-miRNAs were detected in the heart, brain, mammary gland, lung,  
48 liver, kidney and serum exosomes of pig (Luo et al., 2017). The concentration of pl-miR in  
49 different human organs varies and can be compared with en-miR. Some studies have found  
50 minor concentrations of pl-miR in humans and animals (Zhang et al., 2016). The inclusion of pl-  
51 miR into the recipient's organism causes reproducible changes of some properties and  
52 physiological processes in it (Cui et al., 2017; Javed et al., 2017; Lang et al., 2019; Vaucheret et  
53 al., 2012; Zhang et al., 2012). ex-miR involvement in the regulation of recipient gene expression  
54 may affect disease (Chin, Fong & Somlo, 2016; Gopinath, 2019; Hou et al., 2018; Jones et al.,  
55 2016). The program for searching binding sites in target genes can reliably identify pl-miR and  
56 an-miR binding sites regardless of the origin of miRNAs (Ivashchenko et al., 2016), which  
57 makes it possible to predict the interaction of pl-miR with hsa-mRNA. We studied the possible  
58 interactions of pl-miRs with hsa-mRNA genes after pl-miRs have entered the human body. It  
59 was also assumed that pl-miRs can circulate in the blood throughout the body in the absence of  
60 features restricting their entry into any cell (Wagner et al., 2015). The basis for this assumption is  
61 the diversity of the nucleotide composition of hsa-mRNAs, some of which overlap with diverse  
62 pl-miRs (Liang et al., 2013; Pirro et al., 2016).

63 Recently, the miRNAs of plants ingested for food ex-miR have been actively studied in the  
64 regulation of vital processes in humans and animals (Arroyo et al., 2011; Liang et al., 2012; Luo  
65 et al., 2017; Vaucheret & Chupeau, 2012; Zhang et al., 2016). It is presumed that ex-miRs  
66 regulate cellular function in healthy cells and act as important mediators in the development of  
67 animal diseases (Cong et al., 2018; Hoy & Buck, 2012; Makarova et al., 2016; Rutter & Innes,  
68 2018). Ex-miRs can function as evolutionary linkers between different species and contribute to  
69 signal transmission both within and between species (Arteaga-Vazquez et al., 2006; Axtell,  
70 Westholm & Lai, 2011; Millar & Waterhouse, 2005; Moran et al., 2017; Zhao, Cong & Lukiw,  
71 2018). Based on the available data, the authors suggest that such xe-miRNAs contribute to the  
72 beneficial properties of medicinal plants (Lukasik & Zielenkiewicz, 2016; Xie, Weng & Melzig,  
73 2016), contribute to the negative properties of disease-causing or poisonous plants, and cross-

74 link species between kingdoms of living organisms by participating in many of the mechanisms  
75 associated with the occurrence and pathogenesis of various diseases (Mallocci et al., 2018;  
76 Melnik, John & Schmitz, 2014; Perge et al., 2017; Pogue et al., 2014).

77 To determine which pl-miRs affect the mRNAs of human genes, we chose osa-miRNAs  
78 because rice has the most miRNAs in the plants, and rice is the most common source of human  
79 nutrition. Most plants contain well-known miRNAs, which serve as typical regulators of plant  
80 growth and development (Bari, Orazova & Ivashchenko, 2013; Bari et al., 2014, Nair et al.,  
81 2010).

## 82 **Results**

### 83 **Characteristics of the interaction of single osa-miRNAs with mRNA of human genes**

84 Currently, 738 miRNAs encoded by the rice genome are known. For these osa-miRNAs, target  
85 genes from among 17508 human genes were searched. A total of 82 miRNAs with one to four  
86 target genes were identified (Table S1). miR11339-3p and miR11339-5p; miR1425-3p and  
87 miR1425-5p; miR1432-3p and miR1432-5p; miR1870-3p and miR1870-5p; miR2096-3p and  
88 miR2096-5p; miR2867-3p and miR2867-5p; and miR390-3p and miR390-5p, originating from  
89 the same pre-miRNA, had binding sites in the mRNAs of different genes. The functions of the  
90 162 identified target genes were diverse.

91 In the group of 49 miRNAs with five or more target genes, there were several miR-3p/miR-5p  
92 pairs that originated from the same pre-miRNA (Table S2). The total number of target genes for  
93 miRNAs with five or more genes was 479. The number of target genes for miR408-3p,  
94 miR5150-3p, miR528-3p, and miR530-3p was comparable to the number of target genes for  
95 miR408-5p, miR5150-5p, miR528-5p, and miR530-5p. For miR1847.1-5p, miR1850.1-5p,  
96 miR2094-5p, miR2097-5p, miR2102-5p, and miR3979-5p, the set of target genes was  
97 significantly larger than that for each corresponding miRNA-3p. Only miR5144-3p had four-fold  
98 more target genes compared to the number attributed to miR5144-5p. The miRNAs with the  
99 largest number of target genes were miR2102-5p (38 genes), miR5075-3p (36 genes), miR2097-  
100 5p (23 genes), and miR2919 (19 genes). Consequently, at high concentrations, these miRNAs  
101 could significantly change the metabolism of recipient human cells.

102 A total of 641 target genes were identified for 131 single miRNAs, which is approximately  
103 3.7% of the total number of studied human genes.

104 Table 1 shows the characteristics of the binding of some osa-miRNAs with mRNAs of human  
105 genes. Each of the 35 miRNAs could bind to mRNAs of one target gene, six miRNAs had targets  
106 with two genes, and four miRNAs had three target genes with a value  $\Delta G/\Delta G_m$  equal to 94-  
107 98%. miR2102-5p had 11 target genes with a value  $\Delta G/\Delta G_m$  of 94-100%, and the free energy of  
108 the interaction of the miRNAs with the mRNAs of these genes varied from -115 kJ/mole to -121

109 kJ/mole. The miR2102-5p binding sites were located mainly in the 5'UTR, which suggests that  
 110 they have a role in the early inhibition of the translation process. However, this property of  
 111 miR2102-5p indicates the need to control its plant food-derived concentration in the human  
 112 body. 19 target genes were associated with miR2919. miR5075-3p could bind to three mRNAs at  
 113 binding sites located in the coding domain sequence and the 5'-untranslated region. The high-  
 114 affinity binding sites were located in the 5'UTR and CDS of the mRNAs with the  $\Delta G/\Delta G_m$  value  
 115 was 94-98%. 17 miRNA binding sites were located in 5'UTR, 39 in CDS and 33 in 3'-  
 116 untranslated region. Therefore, monitoring the concentrations of miR2102-5p, miR2919 and  
 117 miR5075-3p in human biological fluids is also necessary.

118

**Table 1.** Characteristics of Interaction single osa-miRNAs with mRNA of Human Genes

| Gene            | osa-miRNA    | Start of site,<br>nt | Region<br>of miRNA | $\Delta G$ ,<br>kJ/mole | $\Delta G/\Delta G_m$ ,<br>% | Length,<br>nt |
|-----------------|--------------|----------------------|--------------------|-------------------------|------------------------------|---------------|
| <i>CPA3</i>     | miR1320-3p   | 671                  | CDS                | -98                     | 96                           | 21            |
| <i>PPAP2B</i>   | miR1320-3p   | 2135                 | 3'UTR              | -96                     | 94                           | 21            |
| <i>CNPY1</i>    | miR1426-5p   | 2094                 | 3'UTR              | -93                     | 94                           | 21            |
| <i>NSL1</i>     | miR1440-5p   | 4601                 | 3'UTR              | -98                     | 94                           | 20            |
| <i>PSEN2</i>    | miR1847.1-5p | 1785                 | 3'UTR              | -108                    | 96                           | 21            |
| <i>MDN1</i>     | miR1855-3p   | 13027                | CDS                | -106                    | 94                           | 21            |
| <i>KLHDC10</i>  | miR1860-3p   | 3134                 | 3'UTR              | -108                    | 96                           | 22            |
| <i>TIE1</i>     | miR1860-3p   | 3139                 | CDS                | -106                    | 94                           | 22            |
| <i>OSTM1</i>    | miR2093-3p   | 848                  | CDS                | -93                     | 96                           | 20            |
| <i>ZNF80</i>    | miR2099-3p   | 2562                 | 3'UTR              | -96                     | 94                           | 20            |
| <i>SLC36A3</i>  | miR2099-5p   | 2769                 | 3'UTR              | -100                    | 94                           | 22            |
| <i>AFAP1</i>    | miR2102-5p   | 144                  | 5'UTR              | -115                    | 95                           | 20            |
| <i>C19orf6</i>  | miR2102-5p   | 193                  | CDS                | -115                    | 95                           | 20            |
| <i>CHSY1</i>    | miR2102-5p   | 348                  | 5'UTR              | -117                    | 96                           | 20            |
| <i>DIRC2</i>    | miR2102-5p   | 233                  | CDS                | -117                    | 96                           | 20            |
| <i>KATNAL1</i>  | miR2102-5p   | 80                   | 5'UTR              | -117                    | 96                           | 20            |
| <i>NR1D2</i>    | miR2102-5p   | 254                  | 5'UTR              | -117                    | 96                           | 20            |
| <i>PDAP1</i>    | miR2102-5p   | 29                   | 5'UTR              | -115                    | 95                           | 20            |
| <i>PPP2R5C</i>  | miR2102-5p   | 72                   | 5'UTR              | -115                    | 95                           | 20            |
| <i>RHOBTB2</i>  | miR2102-5p   | 158                  | 5'UTR              | -115                    | 95                           | 20            |
| <i>UHRF1BP1</i> | miR2102-5p   | 112                  | 5'UTR              | -115                    | 95                           | 20            |
| <i>WT1</i>      | miR2102-5p   | 450                  | CDS                | -121                    | 100                          | 20            |
| <i>ZNF442</i>   | miR2866-5p   | 1020                 | CDS                | -98                     | 96                           | 20            |
| <i>PCDHB15</i>  | miR2866-5p   | 582                  | CDS                | -96                     | 94                           | 20            |
| <i>GPR20</i>    | miR2867-3p   | 455                  | CDS                | -106                    | 94                           | 20            |
| <i>TMEM38A</i>  | miR2867-3p   | 236                  | CDS                | -106                    | 94                           | 20            |
| <i>ATP13A3</i>  | miR2867-5p   | 3035                 | CDS                | -115                    | 95                           | 22            |
| <i>HK2</i>      | miR2868-5p   | 6645                 | 3'UTR              | -93                     | 96                           | 20            |
| <i>ZNF395</i>   | miR2870-3p   | 863                  | CDS                | -100                    | 94                           | 21            |
| <i>IQGAP1</i>   | miR2876-5p   | 1234                 | CDS                | -102                    | 94                           | 21            |
| <i>ADAMTS5</i>  | miR2919      | 471                  | 5'UTR              | -104                    | 96                           | 19            |
| <i>BDNF</i>     | miR2919      | 2681                 | 3'UTR              | -106                    | 98                           | 19            |
| <i>GPBP1L1</i>  | miR2919      | 1015                 | 5'UTR              | -104                    | 96                           | 19            |
| <i>KIAA1161</i> | miR2919      | 3436                 | 3'UTR              | -106                    | 98                           | 19            |
| <i>AKAP11</i>   | miR2919      | 7158                 | 3'UTR              | -102                    | 94                           | 19            |
| <i>ATG13</i>    | miR2919      | 259                  | 5'UTR              | -102                    | 94                           | 19            |
| <i>C1D</i>      | miR2919      | 543                  | 3'UTR              | -102                    | 94                           | 19            |
| <i>CDC25B</i>   | miR2919      | 661                  | 5'UTR              | -102                    | 94                           | 19            |
| <i>FAM59B</i>   | miR2919      | 257                  | 5'UTR              | -102                    | 94                           | 19            |
| <i>FAM83H</i>   | miR2919      | 4348                 | 3'UTR              | -102                    | 94                           | 19            |
| <i>MINK1</i>    | miR2919      | 4936                 | 3'UTR              | -102                    | 94                           | 19            |
| <i>NEUROD2</i>  | miR2919      | 145                  | 5'UTR              | -102                    | 94                           | 19            |

|                  |             |      |       |      |    |    |
|------------------|-------------|------|-------|------|----|----|
| <i>OTUD4</i>     | miR2919     | 4235 | 3'UTR | -102 | 94 | 19 |
| <i>PRDM11</i>    | miR2919     | 8528 | 3'UTR | -102 | 94 | 19 |
| <i>PTGFRN</i>    | miR2919     | 5633 | 3'UTR | -102 | 94 | 19 |
| <i>RGS9BP</i>    | miR2919     | 2857 | 3'UTR | -102 | 94 | 19 |
| <i>SPRY4</i>     | miR2919     | 1576 | 3'UTR | -102 | 94 | 19 |
| <i>ZNF304</i>    | miR2919     | 2752 | 3'UTR | -102 | 94 | 19 |
| <i>ZNF385A</i>   | miR2919     | 1388 | 3'UTR | -102 | 94 | 19 |
| <i>KPNA4</i>     | miR2923-5p  | 7223 | 3'UTR | -93  | 94 | 22 |
| <i>SHISA6</i>    | miR2925-5p  | 71   | CDS   | -106 | 94 | 19 |
| <i>SPON1</i>     | miR2925-5p  | 93   | 5'UTR | -106 | 94 | 19 |
| <i>ZNHIT2</i>    | miR2925-5p  | 559  | CDS   | -106 | 94 | 19 |
| <i>UFSP1</i>     | miR2931-5p  | 960  | 3'UTR | -91  | 96 | 20 |
| <i>IGSF3</i>     | miR394-5p   | 2007 | CDS   | -102 | 94 | 20 |
| <i>PGAP1</i>     | miR394-5p   | 9153 | 3'UTR | -102 | 94 | 20 |
| <i>ZNF425</i>    | miR3979-5p  | 512  | CDS   | -102 | 94 | 20 |
| <i>RBMS2</i>     | miR408-3p   | 7343 | 3'UTR | -113 | 95 | 21 |
| <i>PPM1F</i>     | miR408-5p   | 2987 | 3'UTR | -110 | 95 | 21 |
| <i>GPBP1L1</i>   | miR413-5p   | 400  | 5'UTR | -102 | 94 | 21 |
| <i>C14orf142</i> | miR414-5p   | 281  | CDS   | -104 | 94 | 21 |
| <i>LMNA</i>      | miR414-5p   | 1902 | CDS   | -104 | 94 | 21 |
| <i>TMEM30B</i>   | miR414-5p   | 1700 | CDS   | -104 | 94 | 21 |
| <i>PVR</i>       | miR415-5p   | 5452 | 3'UTR | -104 | 94 | 21 |
| <i>SNAPC1</i>    | miR417-3p   | 1169 | CDS   | -98  | 94 | 21 |
| <i>FAM120A</i>   | miR418-3p   | 1029 | CDS   | -98  | 94 | 21 |
| <i>ZNF256</i>    | miR5071-5p  | 348  | CDS   | -102 | 94 | 21 |
| <i>NR2F2</i>     | miR5075-3p  | 350  | 5'UTR | -117 | 95 | 21 |
| <i>PARP2</i>     | miR5075-3p  | 32   | CDS   | -117 | 95 | 21 |
| <i>RPS6KA5</i>   | miR5075-3p  | 261  | CDS   | -121 | 98 | 21 |
| <i>NANOG</i>     | miR5077-5p  | 773  | CDS   | -100 | 94 | 19 |
| <i>PPARGC1A</i>  | miR5144-5p  | 1450 | CDS   | -104 | 94 | 21 |
| <i>FREM2</i>     | miR528-3p   | 1921 | CDS   | -106 | 94 | 21 |
| <i>FXVD6</i>     | miR530-5p   | 788  | CDS   | -100 | 94 | 20 |
| <i>LAMC3</i>     | miR530-5p   | 898  | CDS   | -100 | 94 | 20 |
| <i>NDST1</i>     | miR530-5p   | 6055 | 3'UTR | -100 | 94 | 20 |
| <i>SLC35D1</i>   | miR5339-5p  | 795  | CDS   | -102 | 96 | 21 |
| <i>EML1</i>      | miR535-3p   | 2092 | CDS   | -106 | 94 | 21 |
| <i>LRP5</i>      | miR5488-5p  | 4185 | CDS   | -102 | 94 | 21 |
| <i>SLC25A47</i>  | miR5510-5p  | 678  | CDS   | -108 | 94 | 21 |
| <i>PM20D2</i>    | miR5514-5p  | 1280 | CDS   | -113 | 95 | 21 |
| <i>PPARA</i>     | miR5515-3p  | 1497 | CDS   | -106 | 94 | 21 |
| <i>ZSCAN22</i>   | miR5526-3p  | 2638 | 3'UTR | -102 | 94 | 21 |
| <i>SH3BP2</i>    | miR5532-3p  | 8598 | 3'UTR | -104 | 94 | 22 |
| <i>NANOS1</i>    | miR5534a-5p | 1967 | 3'UTR | -106 | 96 | 21 |
| <i>DUT</i>       | miR5543-5p  | 1619 | 3'UTR | -93  | 94 | 21 |
| <i>OTUD4</i>     | miR5543-5p  | 3680 | 3'UTR | -93  | 94 | 21 |
| <i>COX20</i>     | miR5833-5p  | 396  | CDS   | -117 | 96 | 21 |
| <i>AKAP11</i>    | miR827-3p   | 2985 | CDS   | -100 | 94 | 21 |

119

120

121 Table S1-S3 show information about the genes targeted by plant miRNAs that may be  
 122 involved in the development of various diseases. Most target genes are involved in the  
 123 development of cancer of various types: *ENAH*, *MAPT*, *PRKCE*, *PRRT2*, *RBMS2*, *RHOBTB2*,  
 124 *RPS6KA5* and *ZFH3* - breast cancer (Aisina et al., 2019); *ADAMTS5*, *PRAPRGG1A*, *PVR*,  
 125 *SPRY4* - colorectal cancer; *CHSY1* - colorectal cancer and hepatocellular carcinoma; *PPM1F*,  
 126 *FXVD6*, *DUT*, *FAM83H* - hepatocellular carcinoma; *HK2* - gallbladder cancer and leukaemia;  
 127 *C19orf6* - ovarian carcinoma; *AFAP1* - oesophageal adenocarcinoma; *IOGAP1* - pancreatic

128 ductal adenocarcinoma; *PPP2R5C* - lung adenocarcinoma; *PDAP1* - leukemia; *AKAP11*,  
129 *OSTM1*, *LRP5* - osteopetrosis; *WT1* - ovarian cancer and myeloid leukaemia; *NR1D2* - various  
130 cancers, including glioblastoma; *CDC25B*, *DIRC2* - renal carcinoma; and *UHRF1BP1* - cell  
131 carcinoma of the head and neck. Some genes are associated with other diseases: *NR2F2* -  
132 metabolic gene regulation and congenital heart defect; *PRAPA*, *UFSP1* - with increased  
133 cardiovascular disease; and *ATP13A3* - pulmonary tumour arterial hypertension and psychiatric  
134 disorder. *BDNF* has an important role in the neurogenesis and neuroplasticity of the brain;  
135 *PSEN2* and *LMNA* are associated with Alzheimer's disease; *ZNF442* has a role in psychiatric  
136 disorders; and *NANOS1* is associated with retinoblastoma tumours. The list of oncological  
137 diseases caused by the target genes of the osa-miRNAs indicates that miRNAs can participate in  
138 the development of cancer not only in the gastrointestinal tract but also in other organs.  
139 Therefore, miRNAs that are ingested with food can be transferred to other tissues and organs.

140 The interaction of miRNAs and mRNA nucleotides of target genes shows how effectively  
141 these molecules bind. The schemes presented in Fig. 1 show the formation of hydrogen bonds  
142 between all the nucleotides of miR5075-3p, miR2866-5p, and miR2919 and the binding sites in  
143 mRNA. Because the MirTarget program takes into account the interaction of the noncanonical  
144 pairs A-C and G-U, it can be seen that the interaction of miRNAs and mRNAs preserves the  
145 spiral structures of both molecules, and therefore, stacking interactions are found between all the  
146 nucleotides of the miRNA and mRNA, which stabilize the duplex. miRNA binding sites are  
147 located in the 5'UTR, CDS, and 3'UTR.

148 One form of evidence for the reliability of miRNA interaction with mRNA is the  
149 establishment of a conservative nucleotide sequence of binding sites in mRNA of target genes  
150 (Atambayeva et al., 2017; Bari, Orazova & Ivashchenko, 2013; Bari et al., 2014; Yurikova et al.,  
151 2019). The results of the analysis of the similarity of the nucleotide sequences of the binding  
152 sites in mRNA of the target genes miR2102-5p, miR2919 and miR5075-3p are shown in Fig. 2.  
153 For all miR2102-5p, miR2919, and miR5075-3p binding sites, nucleotide conservation is present  
154 compared to the flanking nucleotides of mRNA target genes. With the complete  
155 complementarity of the nucleotides miRNA and mRNA ( $\Delta G/\Delta G_m = 100\%$ ) of the target genes,  
156 absolute conservatism of the site along the entire binding site should be observed, as previously  
157 shown (Atambayeva et al., 2017; Bari, Orazova & Ivashchenko, 2013; Bari et al., 2014;  
158 Yurikova et al., 2019). When the  $\Delta G/\Delta G_m$  value changes from 94% to 100% (Table 1), the basis  
159 for the interaction of the nucleotides miR2102-5p, miR2919 and miR5075-3p and mRNA are G-  
160 C pairs.

161 **Characteristics of the interaction of osa-miRNA families with mRNAs of human genes**

162 The total number of osa-miRNAs of all families is 146, and the number of their target genes is  
 163 equal to 301, which is 1.7% of 17,508 studied human genes. The characteristics of the interaction  
 164 of 93 osa-miRNAs of all family osa-miRNAs to 86 mRNAs of human genes with values from  
 165 94% to 98% were established (Table 2). miRNA of families such as miR156b-3p,  
 166 miR159a.1,b,f-3p, miR164a,b,c,d,f-5p, miR166a,e-5p, miR166b,c,d,h-5p,  
 167 miR167a,b,c,d,e,f,g,h,i,j-5p, miR172a,d-3p miR172c-3p, miR396d, miR396a,b-3p, miR531b-  
 168 5p, miR815a,b,c-3p, miR1428b,c,d,e-3p and miR1858a,b-5p, has one target gene per family. All  
 169 members of each miRNA family bind at one site due to the homology of their nucleotide  
 170 sequences. Therefore, the expression of the target gene for each miRNA family will depend on  
 171 the total concentration of all miRNA families. The miRNA families miR167e,i-3p, miR168b-5p,  
 172 miR1846a,b,c-5p and miR2907a,b,c,d-3p had two target genes. miR2907a,b,c,d-3p has target  
 173 genes *IRAK2* and *SLC25A37* with mRNAs of which these miRNAs interact with a large free  
 174 energy of -123 kJ/mole and -125 kJ/mole, respectively. miR444b.1,c.1-3p had three target genes  
 175 (*C19orf57*, *KAZN*, *NRG1*).

176

**Table 2.** Characteristics of interactions of osa-miRNA of families in mRNA of human genes

| Gene            | osa-miRNA                        | Start of site, nt | Region of miRNA | $\Delta G$ , kJ/mole | $\Delta G/\Delta G_m$ , % | Length, nt |
|-----------------|----------------------------------|-------------------|-----------------|----------------------|---------------------------|------------|
| <i>ANKRD27</i>  | miR1428b,c,d,e-3p                | 244               | CDS             | -98                  | 96                        | 21         |
| <i>AP2A2</i>    | miR156a,b,c,d,e,f,g,h,i,j,k-5p   | 3797              | 3'UTR           | -104                 | 94                        | 21         |
| <i>OBFC1</i>    | miR156a,b,c,d,e,f,g,h,i,j-5p     | 5427              | 3'UTR           | -100                 | 94                        | 20         |
| <i>ZNF652</i>   | miR156a,b,c,d,e,f,g,h,i,j-5p     | 8125              | 3'UTR           | -100                 | 94                        | 20         |
| <i>MROH2B</i>   | miR156b-3p                       | 4615              | CDS             | -106                 | 94                        | 21         |
| <i>PKHD1</i>    | miR159a.1,b,f-3p                 | 9966              | CDS             | -108                 | 98                        | 21         |
| <i>ASXL1</i>    | miR164a,b,c,d,f-5p               | 1923              | CDS             | -110                 | 95                        | 21         |
| <i>CHST11</i>   | miR166a,e-5p                     | 986               | CDS             | -104                 | 94                        | 21         |
| <i>CCNY</i>     | miR166b,c,d,h-5p                 | 367               | CDS             | -110                 | 95                        | 21         |
| <i>PRICKLE2</i> | miR167a,b,c,d,e,f,g,h,i,j-5p     | 1959              | CDS             | -106                 | 94                        | 21         |
| <i>IL17RB</i>   | miR167e,i-3p                     | 137               | CDS             | -102                 | 94                        | 21         |
| <i>KIAA0528</i> | miR167e,i-3p                     | 523               | CDS             | -102                 | 94                        | 21         |
| <i>APOBR</i>    | miR168b-5p                       | 55                | CDS             | -110                 | 95                        | 21         |
| <i>KLF14</i>    | miR168b-5p                       | 623               | CDS             | -115                 | 98                        | 21         |
| <i>GPR31</i>    | miR172a,d-3p                     | 590               | CDS             | -100                 | 94                        | 21         |
| <i>ATP12A</i>   | miR172c-3p                       | 3557              | 3'UTR           | -102                 | 94                        | 21         |
| <i>EIF3B</i>    | miR1846a,b,c-5p                  | 2194              | CDS             | -119                 | 97                        | 21         |
| <i>FASN</i>     | miR1846a,b,c-5p                  | 11                | 5'UTR           | -117                 | 95                        | 21         |
| <i>C20orf27</i> | miR1858a,b-5p                    | 921               | 3'UTR           | -115                 | 95                        | 21         |
| <i>IRAK2</i>    | miR2907a,b,d-3p                  | 1488              | CDS             | -123                 | 94                        | 22         |
| <i>SLC25A37</i> | miR2907a,b,d-3p                  | 884               | CDS             | -125                 | 95                        | 22         |
| <i>EDN1</i>     | miR395a-q,t,y-3p                 | 1136              | 3'UTR           | -108                 | 96                        | 21         |
| <i>CD22</i>     | miR395b,d,e,g,h-t,y-3p           | 2684              | 3'UTR           | -104                 | 94                        | 21         |
| <i>CMKLR1</i>   | miR396a,b-3p                     | 3970              | 3'UTR           | -98                  | 96                        | 20         |
| <i>SCAMP5</i>   | miR396a,b-5p                     | 1727              | 3'UTR           | -102                 | 94                        | 21         |
| <i>SYVN1</i>    | miR396a,b-5p                     | 854               | CDS             | -102                 | 94                        | 21         |
| <i>AKAP13</i>   | miR396d                          | 1736              | CDS             | -100                 | 94                        | 20         |
| <i>RHBDF1</i>   | miR444a-3p.1, d.1-3p             | 1071              | CDS             | -108                 | 94                        | 21         |
| <i>RUNDC1</i>   | miR444a-3p.1, d.1-3p             | 1191              | CDS             | -108                 | 94                        | 21         |
| <i>CEP250</i>   | miR444a-3p.2, b.2, c.2, d.2,e-3p | 1939              | CDS             | -102                 | 94                        | 21         |
| <i>C19orf57</i> | miR444b.1, c.1-3p                | 714               | CDS             | -106                 | 94                        | 21         |
| <i>KAZN</i>     | miR444b.1, c.1-3p                | 4874              | 3'UTR           | -106                 | 94                        | 21         |
| <i>NRG1</i>     | miR444b.1,c.1-3p                 | 2444              | 3'UTR           | -106                 | 94                        | 21         |

|                 |                |       |       |      |    |    |
|-----------------|----------------|-------|-------|------|----|----|
| <i>ATP6V0A4</i> | miR529a-3p     | 241   | 5'UTR | -100 | 94 | 20 |
| <i>CCDC94</i>   | miR529a-3p     | 379   | CDS   | -100 | 94 | 20 |
| <i>CHD2</i>     | miR529a-3p     | 6684  | 3'UTR | -100 | 94 | 20 |
| <i>MAP7</i>     | miR529a-3p     | 2137  | CDS   | -100 | 94 | 20 |
| <i>MLL</i>      | miR529a-3p     | 11418 | CDS   | -100 | 94 | 20 |
| <i>PDE4B</i>    | miR529a-3p     | 2270  | CDS   | -100 | 94 | 20 |
| <i>ENAH</i>     | miR531b-5p     | 106   | 5'UTR | -115 | 95 | 20 |
| <i>TIFA</i>     | miR815a,b,c-3p | 186   | 5'UTR | -106 | 94 | 21 |

177

178 The miRNAs of the large miR395-3p family had *EDNI* and *CD22* target genes, which are  
 179 involved in the development of diabetes and in the control of immunity, respectively. If these  
 180 miRNAs get in food in large quantities, then the probability of their impact on human health is  
 181 high.

182 miR396a,b-3p can affect the expression of the *CMKLR1* gene, which is involved in  
 183 cardiovascular disease, and for miR396a,b-5p, the *SCAMP5* and *SYVNI* genes are targeted, the  
 184 expression of which changes with autism and colon cancer, respectively. miRNAs of the  
 185 miR444-3p family have binding sites in the mRNA of six genes (Table S4). Their target genes  
 186 *RHBDF1*, *RUNDC1*, *CEP250*, *C19orf57*, *KAZN*, and *NRG1* are involved in oncogenesis and  
 187 other diseases.

188 Therefore, ingestion of these miRNAs with food in humans can significantly affect  
 189 metabolic processes. miR529a-3p had binding sites in the mRNA of six genes that are involved  
 190 in the regulation of several physiological processes (Table S5). If a person in the process of  
 191 evolution consumed this miRNA as a necessary regulator of the expression of its target genes,  
 192 then for this miRNA there must be target genes.

193 Fig. 3 shows the interaction patterns of the nucleotide sequences of some representatives of  
 194 the miRNA families with the mRNA of their target genes. These data indicate a good predictive  
 195 power for identifying miRNA associations and target genes. The visibility of the interaction of  
 196 miRNA and mRNA nucleotides in combination with the quantitative characteristics of binding  
 197 miRNA and mRNA allows us to consider these associations stable and real.

198 Note that the nucleotide sequences miR156, miR166, miR395, miR396, and miR444 did not  
 199 have homologous miRNAs among 2565 human miRNAs from the miRBase base. Therefore,  
 200 these miRNAs do not directly have common binding sites for human miRNAs and can  
 201 independently regulate the expression of their target genes.

202 To confirm the conservatism of the interaction of pl-miR with human target genes, we plotted  
 203 the web logo for mRNA sections containing pl-miR binding sites (Fig. 2). The graphs show the  
 204 high conservatism of these binding sites compared to flanking nucleotide sequences. The  
 205 miR156a-j-5 family, consisting of 10 miRNAs, was associated with the mRNA of seven genes  
 206 (Table S4). The miR156a-j-5 binding sites in each of the genes differed in the number of  
 207 hydrogen bonds (Fig. 3) and the value of the free interaction energy. Similar results were



208 obtained for other miRNA families: miR164e-5p, miR168b-5p, miR396c-3p, miR444a-3p.1,d.1-  
209 3p, miR529a-3p, miR815a,b,c-3p, miR1846a,b,c-5p, miR1858a,b-5p, miR2118l-3p, miR2275d-  
210 3p, miR2907a,b,d-3p, and miR395a-y-3p (Fig. 2). The conservatism of such bonds between  
211 miRNAs and their target genes was established by us for many associations of miRNAs and their  
212 target genes in animals and plants (Atambayeva et al., 2017; Bari, Orazova & Ivashchenko,  
213 2013; Bari et al., 2014; Yurikova et al., 2019). These bonds have persisted over tens of millions  
214 of years of evolution and indicate the early emergence of the process of regulation by miRNA  
215 molecules of target gene expression in animals and plants.

## 216 Discussion

217 Based on the results obtained in this work, the fact of the interaction of pl-miRs with mRNA of  
218 human genes is beyond question. It is necessary to establish the possibilities for these miRNAs  
219 to enter the human and animal organisms. Several studies have shown that miRNAs in various  
220 parts of plants are present in exosomes 30-400 nm in size and are distributed in the body as part  
221 of these nanoparticles (Bang & Thum, 2012; Denzer et al., 2000; Xiao et al., 2018). Such  
222 compaction of miRNAs in exosomes contributes to their conservation and facilitates the entry of  
223 miRNAs into animals through the digestive tract (Redis et al., 2012; Théry, Zitvogel &  
224 Amigorena, 2002; Valadi et al., 2007). Further exosomes together with endogenous exosomes  
225 with blood move to many tissues and organs. According to the physicochemical properties, plant  
226 miRNAs do not differ from animal miRNAs, which makes them competitive when interacting  
227 with mRNA target genes. There are no known limitations for the above-described process of  
228 ingestion of plant-miRNAs into humans and animals.

229 Basically, not all pl-miRs will have human target genes, but the most common and vital pl-  
230 miRs present in plants can have target genes in animals and humans for a long time eating them.  
231 Such pl-miRs usually participate in maintaining the basic physiological functions of plants  
232 (productivity, resistance to biotic and abiotic stresses, growth and development). For example,  
233 developed rice lines overexpressing *MIR529a* have been shown to have increased resistance to  
234 oxidative stress (Chen & Li, 2018; Cimini et al., 2019). The participation of osa-miR159f, osa-  
235 miR1871, osa-miR398b, osa-miR408-3p, osa-miR2878-5p, osa-miR528-5p and osa-miR397a in  
236 the regulation of a number of physiological processes of rice has been established (Balyan et al.,  
237 2017). The expression of miRNA of *Setaria italica* (sit) changed many times: sit-miR1432-3p,  
238 sit-miR156a-5p, sit-miR156b-5p, sit-miR164a-5p, sit-miR167b-5p, sit-miR171c-3p, sit -  
239 miR2118-3p, sit-miR390-5p, sit-miR394-5p, sit-miR395-3p, sit-miR408-3p, sit-miR529a-3p, sit-  
240 miR529b-3p, and sit-miR827, sit-miR159b- 3p, sit-miR319c-5p, sit-miR528-5p and sit-miR535-  
241 5p under various stresses (Wang et al., 2016). In a broader evolutionary context, miRNAs of  
242 *Morus notabilis* were compared to those of seven other plants, including five dicotyledons,

243 *Arabidopsis thaliana*, *Glycine max*, *Malus domestica*, *Populus trichocarpa*, *Ricinus communis*,  
244 and two monocotyledons, *Oryza sativa* and *Zea mays*. Of the 31 *Morus notabilis* miRNA  
245 families, 24 were conserved in the seven plant species. These miRNAs were classified into well-  
246 conserved miRNA families. Prominent among them were mulberry miR160b, miR164a,  
247 miR167a, miR169a, miR390, and miR396b, which completely matched their counterparts in  
248 the seven other plant species, suggesting that those miRNAs were extremely conserved, and  
249 might play critical physiological roles in both dicotyledons and monocotyledons. However,  
250 seven miRNA families, miR482, miR529, miR858, miR4376, miR4414, miR4995, and  
251 miR5523, were found in only one or two plant species. The present data indicated that the  
252 conserved miRNA families (miR156, miR166, miR167, miR168, and miR535) miR159,  
253 miR160, miR164, miR169, miR171, miR172, miR390, miR396, miR397, miR529 and miR4376,  
254 miR162, miR393, miR395, miR398, miR399, miR408 and miR4414 miR319, miR482, miR827,  
255 miR828, miR858, miR2111, miR4995 and miR5523 were expressed across a vast range  
256 exceeded in all three tissues (Jia et al., 2014). In African rice *Oryza glaberrima* (ogl), some  
257 miRNAs such as ogl-miR156l, ogl-miR166c, ogl-miR166k, ogl-miR168a, ogl-miR167i, ogl-  
258 miR171f, ogl-miR1846d of the control library and ogl-miR408, ogl-miR528, ogl-miR156, ogl-  
259 miR390, and ogl-miR396c of the treated library had higher reads than their complementary  
260 strand. This is because miRNA-3p and miRNA-5p may function simultaneously to regulate gene  
261 expression (Mondal et al., 2018). It must be understood that the expression of the target gene  
262 under the influence of miRNAs can increase with decreasing miRNA concentration below the  
263 average physiological level or decrease with increasing miRNA concentration. The data on  
264 changes in miRNA concentration in different plants show that the amount of miRNA consumed  
265 with food depends on the stage of plant ontogenesis, growing conditions, plant organs, food  
266 processing, etc. (Liu et al., 2017). The concentration of pl-miRs after various processing of raw  
267 products decreases, but the remaining miR enter the body (Luo et al., 2017; Zhang et al., 2012;  
268 Zhou et al., 2015).

## 269 **Conclusions**

270 As a result of our study, for the first time, among 17508 human genes, 942 target genes for 277  
271 osa-miRNAs were established. The identified target genes account for 5.4% of the total number  
272 of studied human genes. miRNA binding sites were found in the CDS, 5'UTR and 3'UTR. The  
273 largest number of genes were targeted by osa-miR2102-5p, osa-miR5075-3p, osa-miR2097-5p,  
274 and osa-miR2919, which can bind to the mRNA of 38, 36, 23, and 19 genes, respectively. Since  
275 osa-miRNAs ingested through plant food have many target genes, they should be controlled in  
276 the human body. Most osa-miRNA target genes are involved in the development of diseases,  
277 which makes it easier to clarify the role of miRNAs in these processes. Many osa-miRNA target

278 genes contribute to the development of breast cancer, and other cancer types. The other target  
279 genes are involved in cardiovascular and neurodegenerative diseases. Some osa-miRNAs can be  
280 effective regulators of human gene expression. The effect of miRNAs can be both positive,  
281 contributing to the cure of diseases, and negative, causing a wide range of diseases.

## 282 **Materials & Methods**

283 The nucleotide sequences of the mRNAs of 17508 targeted genes were downloaded from NCBI  
284 GenBank (<http://www.ncbi.nlm.nih.gov>). The nucleotide sequences of the miRNAs were taken  
285 from miRBase v.22 (<http://www.mirbase.org/>). The miRNA binding sites in the mRNAs of  
286 several genes were predicted using the MirTarget program (Ivashchenko et al., 2016). This  
287 program defines the following features of miRNA binding to mRNA: a) the start of the initiation  
288 of the miRNA binding to the mRNAs from the first nucleotide of the mRNA's; b) the  
289 localization of the miRNA binding sites in the 5'-untranslated region (5'UTR), coding domain  
290 sequence (CDS) and 3'-untranslated region (3'UTR) of the mRNAs; c) the free energy of the  
291 interaction between miRNA and the mRNA ( $\Delta G$ , kJ/mole); and d) the schemes of nucleotide  
292 interactions between miRNAs and mRNAs. The ratio  $\Delta G/\Delta G_m$  (%) is determined for each site  
293 ( $\Delta G_m$  equals the free energy of the miRNA binding with its fully complementary nucleotide  
294 sequence). The MirTarget program finds hydrogen bonds between adenine (A) and uracil (U),  
295 guanine (G) and cytosine (C), and G and U, A and C. The distances between the bound A and C  
296 (1.04 nm) and G and U (1.02 nm) are similar to those between bound G and C and A and U,  
297 which are equal to 1.03 nm (Garg & Heinemann, 2018; Kool, 2001; Leontis, Stombaugh &  
298 Westhof, 2002). The numbers of hydrogen bonds in the G-C, A-U, G-U and A-C interactions  
299 were 3, 2, 1 and 1, respectively. By comparison, MirTarget differs from other programs in terms  
300 of finding the binding sites of miRNA on the mRNAs of plant genes (Dai, Zhuang & Zhao,  
301 2011) in that 1) it takes into account the interaction of the miRNA with mRNA over the entire  
302 miRNA sequence; 2) takes into account noncanonical pairs G-U and A-C; and 3) calculates the  
303 free energy of the interaction of the miRNA with mRNA, and when two or more miRNAs are  
304 bound with one mRNA or, if the binding sites of two different miRNAs coincide in part, the  
305 preferred miRNA binding site is considered to be the one for which the free binding energy,  $\Delta G$ ,  
306 is greater. The MirTarget program does not work directly with the miRBase and NCBI  
307 databases. The search for target genes from 17,508 human genes in a special format from NCBI  
308 for the known miRNAs from miRBase will be available on request at [mirtarget8@gmail.com](mailto:mirtarget8@gmail.com).

## 309 **Supplemental Data**

310 **Supplemental table 1.** osa-miRNA list of 1-4 human target genes.

311 **Supplemental table 2.** osa-miRNA list of 5 or more human target genes.

312 **Supplemental table 3.** osa-miRNA of target human genes involved in biological processes.

313 **Supplemental table 4.** list of osa-miRNA families of human target genes.

314 **Supplemental table 5.** osa-miRNA families of target human genes involved in biological processes.

## 315 **Funding**

316 The work was carried out with the financial support of the Ministry of Education and Science of  
317 the Republic of Kazakhstan within the framework of the grant №AP05132460.

318

## 319 **AUTHOR CONTRIBUTIONS**

320 A.I., A.R performed the research and analyzed the data. A.P., D.A contributed analytic tools and  
321 methods. A.I., A.R., A.P., D.A wrote the article.

322

## 323 **References**

324 **Aisina D, Niyazova R, Atambayeva S, Ivashchenko A. 2019.** Prediction of clusters of miRNA  
325 binding sites in mRNA candidate genes of breast cancer subtypes. *PeerJ* **7**: e8049 DOI  
326 10.7717/peerj.8049.

327 **Arroyo JD, Chevillet JR, Kroh EM, Ruf IK, Pritchard CC, Gibson DF, Mitchell PS,**  
328 **Bennett CF, Pogosova-Agadjanyan EL, Stirewalt DL, Tait JF, Tewari M. 2011.**  
329 Argonaute2 complexes carry a population of circulating microRNAs independent of vesicles  
330 in human plasma. *Proceedings of the National Academy of Sciences of the United States of*  
331 *America* **108**: 5003-5008 DOI 10.1073/pnas.1019055108.

332 **Arteaga-Vazquez M, Caballero-Perez J, Vielle-Calzada JP. 2006.** A family of microRNAs  
333 present in plants and animals. *Plant Cell* **18**: 3355-3369 DOI 10.1105/tpc.106.044420.

334 **Atambayeva S, Niyazova R, Ivashchenko A, Pyrkova A, Pinsky I, Akimniyazova A, Labeit**  
335 **S. 2017.** The Binding Sites of miR-619-5p in the mRNAs of Human and Orthologous Genes.  
336 *BMC Genomics* **18**: 428. DOI 10.1186/s12864-017-3811-6.

337 **Axtell MJ, Westholm JO, Lai EC. 2011.** Vive la difference: biogenesis and evolution of  
338 microRNAs in plants and animals. *Genome Biology* **12**: 1-13. DOI 10.1186/gb-2011-12-4-  
339 221.

340 **Balyan S, Kumar M, Mutum R, Raghuvanshi U, Agarwal P, Mathur S, Raghuvanshi S.**  
341 **2017.** Identification of miRNA-mediated drought responsive multi-tiered regulatory network  
342 in drought tolerant rice, Nagina 22. *Scientific Reports* **7**: 15446 DOI 10.1038/s41598-017-  
343 15450-1.

344 **Bang C, Thum T. 2012.** Exosomes: new players in cell–cell communication. *The International*  
345 *Journal of Biochemistry & Cell Biology* **44**:2060–2064 DOI 10.1016/j.biocel.2012.08.007.

346 **Bari A, Orazova S, Ivashchenko A. 2013.** miR156- and miR171-binding sites in the protein-  
347 coding sequences of several plant genes. *BioMed Research International* **2013**: 1-7 DOI  
348 10.1155/2013/307145.

- 349 **Bari A, Sagaidak I, Pinskii I, Orazova S, Ivashchenko A. 2014.** Binding of miR396 to mRNA  
350 of Genes Encoding Growth-Regulating Transcription Factors of Plants. *Russian Journal of*  
351 *Plant Physiology* **61**: 807-810 DOI 10.1134/S1021443714050033.
- 352 **Buck AH, Coakley G, Simbari F, McSorley HJ, Quintana JF, Le Bihan T, Kumar**  
353 **S, Abreu-Goodger C, Lear M, Harcus Y, Ceroni A, Babayan SA, Blaxter M, Ivens**  
354 **A, Maizels RM. 2014.** Exosomes secreted by nematode parasites transfer small RNAs to  
355 mammalian cells and modulate innate immunity. *Nature Communications* **5**: 5488 DOI  
356 10.1038/ncomms6488.
- 357 **Chen J, Li L. 2018.** Multiple Regression Analysis Reveals MicroRNA Regulatory Networks in  
358 *Oryza sativa* under Drought Stress. *International Journal of Genomics* **2018**: 1-12  
359 DOI 10.1155/2018/9395261.
- 360 **Chiang K, Shu J, Zemleni J, Cui J. 2015.** Dietary MicroRNA Database (DMD): An Archive  
361 Database and Analytic Tool for Food-Borne microRNAs. *PLOS One* **10**: 6 DOI  
362 10.1371/journal.pone.0128089.
- 363 **Chin AR, Fong MY, Somlo G. 2016.** Cross-kingdom inhibition of breast cancer growth by  
364 plant miR159. *Cell Research* **26**: 217–228 DOI 10.1038/cr.2016.13.
- 365 **Cimini S, Gualtieri C, Macovei A, Balestrazzi A, De Gara L, Locato V. 2019.** Redox  
366 Balance-DDR-miRNA Triangle: Relevance in Genome Stability and Stress Responses in  
367 Plants. *Frontiers in Plant Science* **10**: 989 DOI 10.3389/fpls.2019.00989.
- 368 **Cong L, Zhao Y, Pogue AI, Lukiw WJ. 2018.** Role of microRNA (miRNA) and Viroids in  
369 Lethal Diseases of Plants and Animals. Potential Contribution to Human Neurodegenerative  
370 Disorders. *Biochemistry (Moscow)* **83**: 1018-1029 DOI 10.1134/S0006297918090031.
- 371 **Cui J, Zhou B, Ross SA, Zemleni J. 2017.** Nutrition, microRNAs, and Human Health.  
372 *Advances in Nutrition* **8**: 105-112 DOI 10.3945/an.116.013839.
- 373 **Dai X, Zhuang Z, Zhao P. 2011.** Computational Analysis of miRNA Targets in Plants: Current  
374 Status and Challenges. *Briefings in Bioinformatics* **12**: 115-121 DOI 10.1093/bib/bbq065.
- 375 **Denzer K, Eijk MV, Kleijmeer MJ, Jakobson E, Groot CD, Geuze HJ. 2000.** Follicular  
376 dendritic cells carry MHC Class II-expressing microvesicles at their surface. *Journal*  
377 *of Immunology* **165**:1259–1265 DOI 10.4049/jimmunol.165.3.1259.
- 378 **Escrevente C, Keller S, Altevogt P, Costa J. 2011.** Interaction and uptake of exosomes by  
379 ovarian cancer cells. *BMC Cancer* **11**: 108 DOI 10.1186/1471-2407-11-108.
- 380 **Garg A, Heinemann U. 2018.** A novel form of RNA double helix based on G·U and  
381 C·A<sup>+</sup> wobble base pairing. *RNA* **24**: 209-218 DOI 10.1261/rna.064048.117.
- 382 **Gopinath MS. 2019.** Dietary non-coding RNAs from plants: Fairy tale or treasure? *Non-coding*  
383 *RNA Research* **4**: 63-68 DOI 10.1016/j.ncrna.2019.02.002.

- 384 **Hou D, He F, Ma L, Cao M, Zhou Z, Wei Z, Xue Y, Sang X, Chong H, Tian C, Zheng S, Li**  
385 **J, Zen K, Chen X, Hong Z, Zhang CY, Jiang X. 2018.** The potential atheroprotective role  
386 of plant MIR156a as a repressor of monocyte recruitment on inflamed human endothelial  
387 cells. *The Journal of Nutritional Biochemistry* **57**: 197-205 DOI  
388 10.1016/j.jnutbio.2018.03.026.
- 389 **Hoy AM, Buck AH. 2012.** Extracellular small RNAs: what, where, why? *Biochemical Society*  
390 *Transactions* **40**: 886-890 DOI 10.1042/BST20120019.
- 391 **Ivashchenko AT, Pyrkova AY, Niyazova RY, Alybayeva A, Baskakov K. 2016.** Prediction of  
392 miRNA binding sites in mRNA. *Bioinformatics* **12**: 237-240. DOI  
393 10.6026/97320630012237.
- 394 **Javed M, Solanki M, Sinha A, Shukla LI. 2017.** Position Based Nucleotide Analysis of  
395 miR168 Family in Higher Plants and its Targets in Mammalian Transcripts. *Microna* **6**: 136-  
396 142 DOI 10.2174/2211536606666170215154151.
- 397 **Jia L, Zhang D, Qi X, Ma B, Xiang Zh, He N, Zhang J. 2014.** Identification of the Conserved  
398 and Novel miRNAs in Mulberry by High-Throughput Sequencing. *PLOS One* **9**: 8 DOI  
399 10.1371/journal.pone.0104409.
- 400 **Jonathan WS, Andrew EH, Stephanie KI, Aaron LB, Stephen YC. 2013.** Ineffective delivery  
401 of diet-derived microRNAs to recipient animal organisms. *RNA Biology* **10**: 1107-1116  
402 DOI 10.4161/rna.24909.
- 403 **Jones Buie JN, Goodwin AJ, Cook JA, Halushka PV, Fan H. 2016.** The role of miRNAs in  
404 cardiovascular disease risk factors. *Atherosclerosis* **254**: 271-281 DOI  
405 10.1016/j.atherosclerosis.2016.09.067.
- 406 **Kool ET. 2001.** Hydrogen bonding, base stacking, and steric effects in DNA replication. *Annual*  
407 *Review of Biophysics and Biomolecular Structure* **30**: 1-22 DOI  
408 10.1146/annurev.biophys.30.1.1.
- 409 **Lang C, Karunairetnam S, Lo KR, Kralicek AV, Crowhurst RN, Gleave AP, MacDiarmid**  
410 **RM, Ingram JR. 2019.** Common Variants of the Plant microRNA-168a Exhibit Differing  
411 Silencing Efficacy for Human Low-Density Lipoprotein Receptor Adaptor Protein 1  
412 (LDLRAP1). *Microna* **8**: 166-170 DOI 10.2174/2211536608666181203103233.
- 413 **Leontis NB, Stombaugh J, Westhof E. 2002.** The non-Watson-Crick base pairs and their  
414 associated isostericity matrices. *Nucleic Acids Research* **30**: 3497–3531 DOI  
415 10.1093/nar/gkf481.
- 416 **Liang H, Huang L, Cao J, Zen K, Chen X, Zhang CY. 2012.** Regulation of mammalian gene  
417 expression by exogenous microRNAs. *Wiley Interdisciplinary Reviews-RNA* **3**: 733-742 DOI  
418 10.1002/wrna.1127.

- 419 **Liang H, Zen K, Zhang J, Zhang CY, Chen X. 2013.** New roles for microRNAs in cross-  
420 species communication. *RNA Biology* **10**: 367-370 DOI 10.4161/rna.23663.
- 421 **Liang H, Zhang S, Fu Z, Wang Y, Wang N, Liu Y, Zhao C, Wu J, Hu Y, Zhang J, Chen X,**  
422 **Zen K, Zhang CY. 2015.** Effective detection and quantification of dietetically absorbed plant  
423 microRNAs in human plasma. *The Journal of Nutritional Biochemistry* **26**: 505-512 DOI  
424 10.1016/j.jnutbio.2014.12.002.
- 425 **Liu W, Meng J, Cui J, Luan Yu. 2017.** Characterization and Function of MicroRNAs in  
426 Plants. *Frontiers in Plant Science* **8**. DOI 10.3389/fpls.2017.02200.
- 427 **Lukasik A, Zielenkiewicz P. 2016.** Plant microRNAs - novel players in natural medicine? *The*  
428 *International Journal of Molecular Sciences* **18**: 1-16 DOI 10.3390/ijms18010009.
- 429 **Luo Y, Wang P, Wang X, Wang Y, Mu Z, Li Q, Fu Y, Xiao J, Li G, Ma Y, Gu Y, Jin L, Ma**  
430 **J, Tang Q, Jiang A, Li X, Li M. 2017.** Detection of dietetically absorbed maize-derived  
431 microRNAs in pigs. *Scientific Reports* **7**: 1-10 DOI 10.1038/s41598-017-00488-y.
- 432 **Makarova JA, Shkurnikov MU, Wicklein D, Lange T, Samatov TR, Turchinovich AA,**  
433 **Tonevitsky AG. 2016.** Intracellular and extracellular microRNA: an update on localization  
434 and biological role. *Progress in Histochemistry and Cytochemistry* **51**: 33-49 DOI  
435 10.1016/j.proghi.2016.06.001.
- 436 **Mallici M, Perdomo L, Veerasamy M, Andriantsitohaina R, Simard G, Martinez MC.**  
437 **2018.** Extracellular vesicles: mechanisms in human health and disease. *Antioxidants & Redox*  
438 *Signaling* **30**: 813-856 DOI 10.1089/ars.2017.7265.
- 439 **Melnik BC, John SM, Schmitz G. 2014.** Milk: an exosomal microRNA transmitter promoting  
440 thymic regulatory T cell maturation preventing the development of atopy? *The Journal of*  
441 *Translational Medicine* **12**: 1-11 DOI 10.1186/1479-5876-12-43.
- 442 **Millar AA, Waterhouse PM. 2005.** Plant and animal microRNAs: similarities and differences.  
443 *Functional & Integrative Genomics* **5**: 129-135 DOI 10.1007/s10142-005-0145-2.
- 444 **Mondal T, Panda A, Rawal H, Sharma T. 2018.** Discovery of microRNA-target modules of  
445 African rice (*Oryza glaberrima*) under salinity stress. *Scientific Reports* **8**: 570  
446 DOI 10.1038/s41598-017-18206-z.
- 447 **Montecalvo A, Larregina AT, Shufesky WJ, Stolz DB, Sullivan ML, Karlsson JM, Baty**  
448 **CJ, Gibson GA, Erdos G, Wang Z, Milosevic J, Tkacheva OA, Divito SJ, Jordan**  
449 **R, Lyons-Weiler J, Watkins SC, Morelli AE. 2012.** Mechanism of transfer of functional  
450 microRNAs between mouse dendritic cells via exosomes. *Blood* **119**: 756-766 DOI  
451 10.1182/blood-2011-02-338004.
- 452 **Moran Y, Agron M, Praher D, Technau U. 2017.** The evolutionary origin of plant and animal  
453 microRNAs. *Nature Ecology & Evolution* **1**: 1-22 DOI 10.1038/s41559-016-0027.

- 454 **Nair SK, Wang N, Turuspekov Y, Pourkheirandish M, Sinsuwongwat S, Chen G, Sameri**  
455 **M, Tagiri A, Honda I, Watanabe Y, Kanamori H, Wicker T, Stein N, Nagamura Y,**  
456 **Matsumoto T, Komatsuda T. 2010.** Cleistogamous flowering in barley arises from the  
457 suppression of microRNA-guided HvAP2 mRNA cleavage. *Proceedings of the National*  
458 *Academy of Sciences of the United States of America* **107**: 490-495 DOI  
459 10.1073/pnas.0909097107.
- 460 **Perge P, Nagy Z, Decmann A, Igaz I, Igaz P. 2017.** Potential relevance of microRNAs in inter-  
461 species epigenetic communication, and implications for disease pathogenesis. *RNA Biology.*  
462 **14**: 391-401 DOI 10.1080/15476286.2016.1251001.
- 463 **Pirro S, Minutolo A, Galgani A, Potesta M, Colizzi V, Montesano C. 2016.** Bioinformatics  
464 prediction and experimental validation of microRNAs involved in cross-kingdom interaction.  
465 *The Journal of Computational Biology* **23**: 976-989 DOI 10.1089/cmb.2016.0059.
- 466 **Pogue AI, Clement C, Hill JM, Lukiw WJ. 2014.** Evolution of microRNA (miRNA) structure  
467 and function in plants and animals: relevance to aging and disease. *Journal of Aging Science*  
468 **2**: 1-12 DOI 10.4172/2329-8847.1000119.
- 469 **Redis RS, Calin S, Yang Y, You MJ, Calin GA. 2012.** Cell-to-cell miRNA transfer:  
470 from body homeostasis to therapy. *Pharmacology & Therapeutics* **136**:169–174  
471 DOI 10.1016/j.pharmthera.2012.08.003.
- 472 **Rutter BD, Innes RW. 2018.** Extracellular vesicles as key mediators of plant–microbe  
473 interactions. *Current Opinion in Plant Biology* **44**: 16-22 DOI 10.1016/j.pbi.2018.01.008.
- 474 **Stephen Y, Snow J. 2017.** Formidable challenges to the notion of biologically important roles  
475 for dietary small RNAs in ingesting mammals. *Genes and Nutrition* **12**: 13  
476 DOI 10.1186/s12263-017-0561-7.
- 477 **They C, Zitvogel L, Amigorena S. 2002.** Exosomes: composition, biogenesis and  
478 function. *Nature Reviews Immunology* **2**:569–579 DOI 10.1038/nri855.
- 479 **Valadi H, Ekström K, Bossios A, Sjöstrand M, Lee JJ, Lötvall JO. 2007.** Exosome-mediated  
480 transfer of mRNAs and microRNAs is a novel mechanism of genetic  
481 exchange between cells. *Nature Cell Biology* **9**:654–659 DOI 10.1038/ncb1596.
- 482 **van der Grein SG, Nolte-'t Hoen EN. 2014.** "Small Talk" in the Innate Immune System via  
483 RNA-Containing Extracellular Vesicles. *Frontiers in Immunology* **5**: 542 DOI  
484 10.3389/fimmu.2014.00542.
- 485 **Vaucheret H, Chupeau Y. 2012.** Ingested plant miRNAs regulate gene expression in animals.  
486 *Cell Research* **1**: 3-5 DOI 10.1038/cr.2011.164.
- 487 **Wagner AE, Piegholdt S, Ferraro M, Pallauf K, Rimbach G. 2015.** Food derived  
488 microRNAs. *Food & Function* **6**: 714-718 DOI 10.1039/c4fo01119h.



- 489 **Wang Yo, Li L, Tang Sh, Liu J, Zhang H, Zhi H, Jia G, Diao X. 2016.** Combined small RNA  
490 and degradome sequencing to identify miRNAs and their targets in response to drought in  
491 foxtail millet. *BMC Genomics* **17**: 57 DOI 10.1186/s12863-016-0364-7.
- 492 **Xiao J, Feng S, Wang X, Long K, Luo Y, Wang Y, Ma J, Tang Q, Jin L, Li X, Li M. 2018.**  
493 Identification of exosome-like nanoparticle-derived microRNAs from 11 edible fruits and  
494 vegetables. *PeerJ* **6**: e5186 DOI 10.7717/peerj.5186.
- 495 **Xie W, Weng A, Melzig MF. 2016.** MicroRNAs as new bioactive components in medicinal  
496 plants. *Planta Medica* **82**: 1153-1162. DOI 10.1055/s-0042-108450.
- 497 **Yurikova OY, Aisina DE, Niyazova RE, Atambayeva SA, Labeit S, Ivashchenko AT. 2019.**  
498 The Interaction of miRNA-5p and miRNA-3p with the mRNAs of Orthologous Genes. *Mol*  
499 *Biol (Mosk)* **53**: 692-704 DOI 10.1134/S0026898419040189.
- 500 **Zempleni J, Aguilar-Lozano A, Sadri M, Sukreet S, Manca S, Wu D, Zhou F, Mutai E.**  
501 **2017.** Biological Activities of Extracellular Vesicles and Their Cargos from Bovine and  
502 Human Milk in Humans and Implications for Infants. *The Journal of Nutrition* **147**: 3-10 DOI  
503 10.3945/jn.116.238949.
- 504 **Zhang L, Chen T, Yin Yo, Zhang Ch, Zhang Yo. 2019.** Dietary microRNA-A Novel  
505 Functional Component of Food. *Advances in Nutrition* **10**: 711-721.  
506 DOI 10.1093/advances/nmy127.
- 507 **Zhang L, Hou D, Chen X, Li D, Zhu L, Zhang Y, Li J, Bian Z, Liang X, Cai X, Yin Y,**  
508 **Wang C, Zhang T, Zhu D, Zhang D, Xu J, Chen Q, Ba Y, Liu J, Wang Q, Chen J, Wang**  
509 **J, Wang M, Zhang Q, Zhang J, Zen K, Zhang CY. 2012.** Exogenous plant MIR168a  
510 specifically targets mammalian LDLRAP1: evidence of cross-kingdom regulation by  
511 microRNA. *Cell Research* **22**: 107-126 DOI 10.1038/cr.2011.158.
- 512 **Zhang H, Li Y, Liu Y, Liu H, Wang H, Jin W, Zhang Y, Zhang C, Xu D. 2016.** Role of plant  
513 microRNA in cross-species regulatory networks of humans. *BMC Systems Biology* **10**: 1-10  
514 DOI 10.1186/s12918-016-0292-1.
- 515 **Zhao Q, Liu Yu, Zhang N, Hu M, Zhang H, Joshi T, Xu D. 2018.** Evidence for plant-derived  
516 xenomiRs based on a large-scale analysis of public small RNA sequencing data from human  
517 samples. *PLOS One* **13**: 6 DOI 10.1371/journal.pone.0187519.
- 518 **ZhaoY, Cong L, Lukiw WJ. 2018.** Plant and animal microRNAs (miRNAs) and their potential  
519 for interkingdom communication. *Cellular and Molecular Neurobiology* **38**: 133-140 DOI  
520 10.1007/s10571-017-0547-4.
- 521 **Zhou Z, Li X, Liu J, Dong L, Chen Q, Liu J, Kong H, Zhang Q, Qi X, Hou D, Zhang**  
522 **L, Zhang G, Liu Y, Zhang Y, Li J, Wang J, Chen X, Wang H, Zhang J, Chen H, Zen**

523 **K, Zhang CY. 2015.** Honeysuckle-encoded atypical microRNA2911 directly targets  
524 influenza A viruses. *Cell research* **1**: 39-49 DOI 10.1038/cr.2014.130.

| Gene, miRNA, start of site, region, $\Delta G$ , $\Delta G/\Delta G_m$                                                                                                                                                                                                                               | Gene, miRNA, start of site, region, $\Delta G$ , $\Delta G/\Delta G_m$                                                                                                      |
|------------------------------------------------------------------------------------------------------------------------------------------------------------------------------------------------------------------------------------------------------------------------------------------------------|-----------------------------------------------------------------------------------------------------------------------------------------------------------------------------|
| <p><i>RPS6KA5</i>, miR5075-3p, 261, CDS, -121, 98, 21</p> <p>5' -GCGGACGGCGCGGACGGAG<b>G</b>A-3'</p> <p>     </p> <p>3' -CGCCUGCCGCCGUGCCUC<b>U</b>U-5'</p>                                                                                                                                          | <p><i>ZNF442</i>, miR2866-5p, 1020, CDS, -98, 96, 20</p> <p>5' -GAUGCUG<b>G</b>ACACAAAC<b>C</b>AGA-3'</p> <p>     </p> <p>3' -CUACGAC<b>U</b>UGUGUUUG<b>A</b>UCU-5'</p>     |
| <p><i>ZNHIT2</i>, miR2925-5p, 559, CDS, -106, 94, 19</p> <p>5' -<b>G</b>CGGAGCCCGCGGCC<b>G</b>CG-3'</p> <p>     </p> <p>3' -<b>U</b>GC<b>U</b>UCGGGCGCCGGCG<b>G</b>U-5'</p>                                                                                                                          | <p><i>C14orf142</i>, miR414-5p, 281, CDS, -104, 94, 21</p> <p>5' -GGACG<b>G</b>UGAUGAUGA<b>A</b>GAUGA-3'</p> <p>     </p> <p>3' -CCUGC<b>U</b>ACUACUACU<b>C</b>CUACU-5'</p> |
| <p><i>EML1</i>, miR535-3p, 2092, CDS, -106, 94, 21</p> <p>5' -AGUGACAACGGGAG<b>G</b>AAG<b>U</b>AC-3'</p> <p>     </p> <p>3' -UCACUGUUGCCCUC<b>U</b>UUC<b>G</b>UG-5'</p>                                                                                                                              | <p><i>C1D</i>, miR2919, 543, 3'UTR, -102, 94, 19</p> <p>5' -UCUU<b>C</b>CCCCCCCCCCCC<b>C</b>C-3'</p> <p>     </p> <p>3' -AGAA<b>A</b>GGGGGGGGGGGG<b>A</b>A-5'</p>           |
| <p>Note: Gene; miRNA; start of binding site (nt); <math>\Delta G</math> (kJ/mole); <math>\Delta G/\Delta G_m</math> (%), length of miRNA (nt). The upper and lower nucleotide sequences of mRNA and miRNA, respectively. The bold type indicates the nucleotide of non-canonical pairs U-G, A-C.</p> |                                                                                                                                                                             |

**Figure 1.** Schemes of the interaction of the nucleotide sequences of osa-miRNA with mRNA human genes.



|                                                                                                                                                                                                                                                                                                                                                                                                                                                                                                                                                                                                                                                                                                                                                                                                                                                                                                                                                                                                                                                                                |                                                                                                                                                                                                                                                                                                                                                                                                                                                                                                                                                                                                                                                                                                                                                                                                                                                                                                                                                                                                                                                                                      |
|--------------------------------------------------------------------------------------------------------------------------------------------------------------------------------------------------------------------------------------------------------------------------------------------------------------------------------------------------------------------------------------------------------------------------------------------------------------------------------------------------------------------------------------------------------------------------------------------------------------------------------------------------------------------------------------------------------------------------------------------------------------------------------------------------------------------------------------------------------------------------------------------------------------------------------------------------------------------------------------------------------------------------------------------------------------------------------|--------------------------------------------------------------------------------------------------------------------------------------------------------------------------------------------------------------------------------------------------------------------------------------------------------------------------------------------------------------------------------------------------------------------------------------------------------------------------------------------------------------------------------------------------------------------------------------------------------------------------------------------------------------------------------------------------------------------------------------------------------------------------------------------------------------------------------------------------------------------------------------------------------------------------------------------------------------------------------------------------------------------------------------------------------------------------------------|
| <p><i>NKRD27</i>, miR1428e-3p, 244, CDS, -98, 96<br/>5' -CAAAUCCAUGGCAUUGUCUUA-3'<br/>     <br/>3' -GUUUAAGUACCGUAAUAGAAU-5'</p> <p><i>AP2A2</i>, miR156k-5p, 3797, 3'UTR, -104, 94<br/>5' -UGUGCUCGUCUCUUCCUGUCA-3'<br/>     <br/>3' -ACACGAG-AGAGAGAAGACAGU-5'</p> <p><i>PKHDI</i>, miR159f-3p, 9966, CDS, -108, 98<br/>5' -UAGAGCUCCCUCCAUAUCAAG-3'<br/>     <br/>3' -AUCUCGAGGGAAGUUAGGUUC-5'</p> <p><i>CHST11</i>, miR166a-5p, 986, CDS, -104, 94<br/>5' -CCUGAACCAGUACAGCAUCC-3'<br/>     <br/>3' -GGAACUUGGUC-UGUUGUAAGG-5'</p> <p><i>CCNY</i>, miR166h-5p, 367, CDS, -110, 96<br/>5' -CCUCGGGCCAGCACAAUAUCC-3'<br/>     <br/>3' -GGAGCUCGGUCG-GUUGUAAGG-5'</p> <p><i>PRICKLE2</i>, miR167d-5p, 1959, CDS, -106, 94<br/>5' -CAGGACAUGCUGGCAGCUUCA-3'<br/>     <br/>3' -GUCUAGUACGACCGUCGAAGU-5'</p> <p><i>KLF14</i>, miR168b-5p, 623, CDS, -115, 98<br/>5' -UUCCGGGCUGCACC AAAGCCU-3'<br/>     <br/>3' -AAGGGCUCGACGUGGUU-CGGA-5'</p> <p><i>GPR31</i>, miR172a-3p, 590, CDS, -100, 94<br/>5' -AUGCAGGCAUCAUCAGGGCUCU-3'<br/>     <br/>3' -UACGUC-GUAGUAGUUCUAAGA-5'</p> | <p><i>EIF3B</i>, miR1846b-5p, 2194, CDS, -119, 97<br/>5' -GGCGGCCCGGCCUCCACACU-3'<br/>     <br/>3' -UCGCCGGGGCCGGAGGA-GUGA-5'</p> <p><i>SLC25A37</i>, miR2907a-3p, 884, CDS, -125, 95<br/>5' -CCGGGGCCUCGCGCGGCCGCC-3'<br/>     <br/>3' -GGCUCGGGAGCGA-GCCGACGG-5'</p> <p><i>CD22</i>, miR395t-3p, 2684, 3'UTR, -104, 94<br/>5' -GAGUUUCCCAGACACCGCCAC-3'<br/>     <br/>3' -CUCAAAGGGGUUGUGA-AGUG-5'</p> <p><i>SYVNI</i>, miR396a-5p, 854, CDS, -102, 94<br/>5' -CAGUUCAAGAAAGCUGUGACAG-3'<br/>     <br/>3' -GUCAAGUUCUUUCGACACC-UU-5'</p> <p><i>C19orf57</i>, miR444b.1-3p, 714, CDS, -106, 94<br/>5' -GACAGCAAGCCUGAGACAGACA-3'<br/>     <br/>3' -CCGUCGUUCGAACUCUGU-UGU-5'</p> <p><i>PDE4B</i>, miR529a-3p, 2270, CDS, -100, 94<br/>5' -GAAGGAGGGAGAGGGACACAG-3'<br/>     <br/>3' -CUUCUUCUCUCUCCC-AUGUC-5'</p> <p><i>ENAH</i>, miR531b-5p, 106, 5'UTR, -115, 95<br/>5' -CGGGCGCGGGCCCGGGCGGG-3'<br/>     <br/>3' -GCC-GUGCGUCGGGGCCGCUC-5'</p> <p><i>TIFA</i>, miR815a-3p, 186, 5'UTR, -106, 94<br/>5' -CCCAGUCUCCUGAUUCCUCCUC-3'<br/>     <br/>3' -GGGUAGAGGAGUUA-GGGGAA-5'</p> |
| <p>Note: Gene; miRNA; start of binding site (nt); <math>\Delta G</math> (kJ/mole); <math>\Delta G/\Delta G_m</math> (%), length of miRNA (nt). The upper and lower nucleotide sequences of mRNA and miRNA, respectively. The bold type indicates the nucleotide of non-canonical pairs U-G, A-C.</p>                                                                                                                                                                                                                                                                                                                                                                                                                                                                                                                                                                                                                                                                                                                                                                           |                                                                                                                                                                                                                                                                                                                                                                                                                                                                                                                                                                                                                                                                                                                                                                                                                                                                                                                                                                                                                                                                                      |

**Figure 3.** Schemes of the interaction of nucleotide sequences of osa-miRNA families with mRNA human genes.

## Parsed Citations

**Aisina D, Niyazova R, Atambayeva S, Ivashchenko A. 2019. Prediction of clusters of miRNA binding sites in mRNA candidate genes of breast cancer subtypes. PeerJ 7: e8049 DOI 10.7717/peerj.8049.**

Pubmed: [Author and Title](#)

Google Scholar: [Author Only Title Only Author and Title](#)

**Arroyo JD, Chevillet JR, Kroh EM, Ruf IK, Pritchard CC, Gibson DF, Mitchell PS, Bennett CF, Pogosova-Agadjanian EL, Stirewalt DL, Tait JF, Tewari M. 2011. Argonaute2 complexes carry a population of circulating microRNAs independent of vesicles in human plasma. Proceedings of the National Academy of Sciences of the United States of America 108: 5003-5008 DOI 10.1073/pnas.1019055108.**

Pubmed: [Author and Title](#)

Google Scholar: [Author Only Title Only Author and Title](#)

**Arteaga-Vazquez M, Caballero-Perez J, Vielle-Calzada JP. 2006. A family of microRNAs present in plants and animals. Plant Cell 18: 3355-3369 DOI 10.1105/tpc.106.044420.**

Pubmed: [Author and Title](#)

Google Scholar: [Author Only Title Only Author and Title](#)

**Atambayeva S, Niyazova R, Ivashchenko A, Pyrkova A, Pinsky I, Akimniyazova A, Labeit S. 2017. The Binding Sites of miR-619-5p in the mRNAs of Human and Orthologous Genes. BMC Genomics 18: 428. DOI 10.1186/s12864-017-3811-6.**

Pubmed: [Author and Title](#)

Google Scholar: [Author Only Title Only Author and Title](#)

**Axtell MJ, Westholm JO, Lai EC. 2011. Vive la difference: biogenesis and evolution of microRNAs in plants and animals. Genome Biology 12: 1-13. DOI 10.1186/gb-2011-12-4-221.**

Pubmed: [Author and Title](#)

Google Scholar: [Author Only Title Only Author and Title](#)

**Balyan S, Kumar M, Mutum R, Raghuvanshi U, Agarwal P, Mathur S, Raghuvanshi S. 2017. Identification of miRNA-mediated drought responsive multi-tiered regulatory network in drought tolerant rice, Nagina 22. Scientific Reports 7: 15446 DOI 10.1038/s41598-017-15450-1.**

Pubmed: [Author and Title](#)

Google Scholar: [Author Only Title Only Author and Title](#)

**Bang C, Thum T. 2012. Exosomes: new players in cell-cell communication. The International Journal of Biochemistry & Cell Biology 44:2060-2064 DOI 10.1016/j.biocel.2012.08.007.**

Pubmed: [Author and Title](#)

Google Scholar: [Author Only Title Only Author and Title](#)

**Bari A, Orazova S, Ivashchenko A. 2013. miR156- and miR171-binding sites in the protein-coding sequences of several plant genes. BioMed Research International 2013: 1-7 DOI 10.1155/2013/307145.**

Pubmed: [Author and Title](#)

Google Scholar: [Author Only Title Only Author and Title](#)

**Bari A, Sagaidak I, Pinski I, Orazova S, Ivashchenko A. 2014. Binding of miR396 to mRNA of Genes Encoding Growth-Regulating Transcription Factors of Plants. Russian Journal of Plant Physiology 61: 807-810 DOI 10.1134/S1021443714050033.**

Pubmed: [Author and Title](#)

Google Scholar: [Author Only Title Only Author and Title](#)

**Buck AH, Coakley G, Simbari F, McSorley HJ, Quintana JF, Le Bihan T, Kumar S, Abreu-Goodger C, Lear M, Harcus Y, Ceroni A, Babayan SA, Blaxter M, Ivens A, Maizels RM. 2014. Exosomes secreted by nematode parasites transfer small RNAs to mammalian cells and modulate innate immunity. Nature Communications 5: 5488 DOI 10.1038/ncomms6488.**

Pubmed: [Author and Title](#)

Google Scholar: [Author Only Title Only Author and Title](#)

**Chen J, Li L. 2018. Multiple Regression Analysis Reveals MicroRNA Regulatory Networks in Oryza sativa under Drought Stress. International Journal of Genomics 2018: 1-12 DOI 10.1155/2018/9395261.**

Pubmed: [Author and Title](#)

Google Scholar: [Author Only Title Only Author and Title](#)

**Chiang K, Shu J, Zemleni J, Cui J. 2015. Dietary MicroRNA Database (DMD): An Archive Database and Analytic Tool for Food-Borne microRNAs. PLOS One 10: 6 DOI 10.1371/journal.pone.0128089.**

Pubmed: [Author and Title](#)

Google Scholar: [Author Only Title Only Author and Title](#)

**Chin AR, Fong MY, Somlo G. 2016. Cross-kingdom inhibition of breast cancer growth by plant miR159. Cell Research 26: 217-228 DOI 10.1038/cr.2016.13.**

Pubmed: [Author and Title](#)

Google Scholar: [Author Only Title Only Author and Title](#)

**Cimini S, Gualtieri C, Macovei A, Balestrazzi A, De Gara L, Locato V. 2019. Redox Balance-DDR-miRNA Triangle: Relevance in Genome Stability and Stress Responses in Plants. Frontiers in Plant Science 10: 989 DOI 10.3389/fpls.2019.00989.**

Pubmed: [Author and Title](#)

Google Scholar: [Author Only Title Only Author and Title](#)

Cong L, Zhao Y, Pogue AI, Lukiw WJ. 2018. Role of microRNA (miRNA) and Viroids in Lethal Diseases of Plants and Animals. Potential Contribution to Human Neurodegenerative Disorders. *Biochemistry (Moscow)* 83: 1018-1029 DOI 10.1134/S0006297918090031.

Pubmed: [Author and Title](#)

Google Scholar: [Author Only Title Only Author and Title](#)

Cui J, Zhou B, Ross SA, Zempleni J. 2017. Nutrition, microRNAs, and Human Health. *Advances in Nutrition* 8: 105-112 DOI 10.3945/an.116.013839.

Pubmed: [Author and Title](#)

Google Scholar: [Author Only Title Only Author and Title](#)

Dai X, Zhuang Z, Zhao P. 2011. Computational Analysis of miRNA Targets in Plants: Current Status and Challenges. *Briefings in Bioinformatics* 12: 115-121 DOI 10.1093/bib/bbq065.

Pubmed: [Author and Title](#)

Google Scholar: [Author Only Title Only Author and Title](#)

**Denzer K, Eijk MV, Kleijmeer MJ, Jakobson E, Groot CD, Geuze HJ. 2000. Follicular dendritic cells carry MHC Class II-expressing microvesicles at their surface. *Journal***

**of Immunology** 165:1259–1265 DOI 10.4049/jimmunol.165.3.1259.

Pubmed: [Author and Title](#)

Google Scholar: [Author Only Title Only Author and Title](#)

Escrevente C, Keller S, Altevogt P, Costa J. 2011. Interaction and uptake of exosomes by ovarian cancer cells. *BMC Cancer* 11: 108 DOI 10.1186/1471-2407-11-108.

Pubmed: [Author and Title](#)

Google Scholar: [Author Only Title Only Author and Title](#)

Garg A, Heinemann U. 2018. A novel form of RNA double helix based on G-U and C-A<sup>+</sup> wobble base pairing. *RNA* 24: 209-218 DOI 10.1261/rna.064048.117.

Pubmed: [Author and Title](#)

Google Scholar: [Author Only Title Only Author and Title](#)

Gopinath MS. 2019. Dietary non-coding RNAs from plants: Fairy tale or treasure? *Non-coding RNA Research* 4: 63-68 DOI 10.1016/j.ncrna.2019.02.002.

Pubmed: [Author and Title](#)

Google Scholar: [Author Only Title Only Author and Title](#)

Hou D, He F, Ma L, Cao M, Zhou Z, Wei Z, Xue Y, Sang X, Chong H, Tian C, Zheng S, Li J, Zen K, Chen X, Hong Z, Zhang CY, Jiang X. 2018. The potential atheroprotective role of plant MIR156a as a repressor of monocyte recruitment on inflamed human endothelial cells. *The Journal of Nutritional Biochemistry* 57: 197-205 DOI 10.1016/j.jnutbio.2018.03.026.

Pubmed: [Author and Title](#)

Google Scholar: [Author Only Title Only Author and Title](#)

Hoy AM, Buck AH. 2012. Extracellular small RNAs: what, where, why? *Biochemical Society Transactions* 40: 886-890 DOI 10.1042/BST20120019.

Pubmed: [Author and Title](#)

Google Scholar: [Author Only Title Only Author and Title](#)

Ivashchenko AT, Pyrkova AY, Niyazova RY, Alybayeva A, Baskakov K. 2016. Prediction of miRNA binding sites in mRNA. *Bioinformatics* 12: 237-240. DOI 10.6026/97320630012237.

Pubmed: [Author and Title](#)

Google Scholar: [Author Only Title Only Author and Title](#)

Javed M, Solanki M, Sinha A, Shukla LI. 2017. Position Based Nucleotide Analysis of miR168 Family in Higher Plants and its Targets in Mammalian Transcripts. *Microna* 6: 136-142 DOI 10.2174/2211536606666170215154151.

Pubmed: [Author and Title](#)

Google Scholar: [Author Only Title Only Author and Title](#)

Jia L, Zhang D, Qi X, Ma B, Xiang Zh, He N, Zhang J. 2014. Identification of the Conserved and Novel miRNAs in Mulberry by High-Throughput Sequencing. *PLOS One* 9: 8 DOI 10.1371/journal.pone.0104409.

Pubmed: [Author and Title](#)

Google Scholar: [Author Only Title Only Author and Title](#)

Jonathan WS, Andrew EH, Stephanie KI, Aaron LB, Stephen YC. 2013. Ineffective delivery of diet-derived microRNAs to recipient animal organisms. *RNA Biology* 10: 1107-1116 DOI 10.4161/rna.24909.

Pubmed: [Author and Title](#)

Google Scholar: [Author Only Title Only Author and Title](#)

Jones Buie JN, Goodwin AJ, Cook JA, Halushka PV, Fan H. 2016. The role of miRNAs in cardiovascular disease risk factors. *Atherosclerosis* 254: 271-281 DOI 10.1016/j.atherosclerosis.2016.09.067.

Pubmed: [Author and Title](#)

Google Scholar: [Author Only Title Only Author and Title](#)

**Kool ET. 2001. Hydrogen bonding, base stacking, and steric effects in DNA replication. Annual Review of Biophysics and Biomolecular Structure 30: 1-22 DOI 10.1146/annurev.biophys.30.1.1.**

Pubmed: [Author and Title](#)

Google Scholar: [Author Only Title Only Author and Title](#)

**Lang C, Karunairetnam S, Lo KR, Kralicek AV, Crowhurst RN, Gleave AP, MacDiarmid RM, Ingram JR. 2019. Common Variants of the Plant microRNA-168a Exhibit Differing Silencing Efficacy for Human Low-Density Lipoprotein Receptor Adaptor Protein 1 (LDLRAP1). Microna 8: 166-170 DOI 10.2174/2211536608666181203103233.**

Pubmed: [Author and Title](#)

Google Scholar: [Author Only Title Only Author and Title](#)

**Leontis NB, Stombaugh J, Westhof E. 2002. The non-Watson-Crick base pairs and their associated isostericity matrices. Nucleic Acids Research 30: 3497-3531 DOI 10.1093/nar/gkf481.**

Pubmed: [Author and Title](#)

Google Scholar: [Author Only Title Only Author and Title](#)

**Liang H, Huang L, Cao J, Zen K, Chen X, Zhang CY. 2012. Regulation of mammalian gene expression by exogenous microRNAs. Wiley Interdisciplinary Reviews-RNA 3: 733-742 DOI 10.1002/wrna.1127.**

Pubmed: [Author and Title](#)

Google Scholar: [Author Only Title Only Author and Title](#)

**Liang H, Zen K, Zhang J, Zhang CY, Chen X. 2013. New roles for microRNAs in cross-species communication. RNA Biology 10: 367-370 DOI 10.4161/rna.23663.**

Pubmed: [Author and Title](#)

Google Scholar: [Author Only Title Only Author and Title](#)

**Liang H, Zhang S, Fu Z, Wang Y, Wang N, Liu Y, Zhao C, Wu J, Hu Y, Zhang J, Chen X, Zen K, Zhang CY. 2015. Effective detection and quantification of dietetically absorbed plant microRNAs in human plasma. The Journal of Nutritional Biochemistry 26: 505-512 DOI 10.1016/j.jnutbio.2014.12.002.**

Pubmed: [Author and Title](#)

Google Scholar: [Author Only Title Only Author and Title](#)

**Liu W, Meng J, Cui J, Luan Yu. 2017. Characterization and Function of MicroRNAs in Plants. Frontiers in Plant Science 8. DOI 10.3389/fpls.2017.02200.**

Pubmed: [Author and Title](#)

Google Scholar: [Author Only Title Only Author and Title](#)

**Lukasik A, Zielenkiewicz P. 2016. Plant microRNAs - novel players in natural medicine? The International Journal of Molecular Sciences 18: 1-16 DOI 10.3390/ijms18010009.**

Pubmed: [Author and Title](#)

Google Scholar: [Author Only Title Only Author and Title](#)

**Luo Y, Wang P, Wang X, Wang Y, Mu Z, Li Q, Fu Y, Xiao J, Li G, Ma Y, Gu Y, Jin L, Ma J, Tang Q, Jiang A, Li X, Li M. 2017. Detection of dietetically absorbed maize-derived microRNAs in pigs. Scientific Reports 7: 1-10 DOI 10.1038/s41598-017-00488-y.**

Pubmed: [Author and Title](#)

Google Scholar: [Author Only Title Only Author and Title](#)

**Makarova JA, Shkurnikov MU, Wicklein D, Lange T, Samatov TR, Turchinovich AA, Tonevitsky AG. 2016. Intracellular and extracellular microRNA: an update on localization and biological role. Progress in Histochemistry and Cytochemistry 51: 33-49 DOI 10.1016/j.proghi.2016.06.001.**

Pubmed: [Author and Title](#)

Google Scholar: [Author Only Title Only Author and Title](#)

**Mallocci M, Perdomo L, Veerasamy M, Andriantsitohaina R, Simard G, Martinez MC. 2018. Extracellular vesicles: mechanisms in human health and disease. Antioxidants & Redox Signaling 30: 813-856 DOI 10.1089/ars.2017.7265.**

Pubmed: [Author and Title](#)

Google Scholar: [Author Only Title Only Author and Title](#)

**Melnik BC, John SM, Schmitz G. 2014. Milk: an exosomal microRNA transmitter promoting thymic regulatory T cell maturation preventing the development of atopy? The Journal of Translational Medicine 12: 1-11 DOI 10.1186/1479-5876-12-43.**

Pubmed: [Author and Title](#)

Google Scholar: [Author Only Title Only Author and Title](#)

**Millar AA, Waterhouse PM. 2005. Plant and animal microRNAs: similarities and differences. Functional & Integrative Genomics 5: 129-135 DOI 10.1007/s10142-005-0145-2.**

Pubmed: [Author and Title](#)

Google Scholar: [Author Only Title Only Author and Title](#)

**Mondal T, Panda A, Rawal H, Sharma T. 2018. Discovery of microRNA-target modules of African rice (*Oryza glaberrima*) under salinity stress. Scientific Reports 8: 570 DOI 10.1038/s41598-017-18206-z.**

Pubmed: [Author and Title](#)

Google Scholar: [Author Only Title Only Author and Title](#)

**Montecalvo A, Larregina AT, Shufesky WJ, Stolz DB, Sullivan ML, Karlsson JM, Baty CJ, Gibson GA, Erdos G, Wang Z, Milosevic J,**



Tkacheva OA, Divito SJ, Jordan R, Lyons-Weiler J, Watkins SC, Morelli AE. 2012. Mechanism of transfer of functional microRNAs between mouse dendritic cells via exosomes. *Blood* 119: 756-766 DOI 10.1182/blood-2011-02-338004.

Pubmed: [Author and Title](#)

Google Scholar: [Author Only](#) [Title Only](#) [Author and Title](#)

Moran Y, Agron M, Praher D, Technau U. 2017. The evolutionary origin of plant and animal microRNAs. *Nature Ecology & Evolution* 1: 1-22 DOI 10.1038/s41559-016-0027.

Pubmed: [Author and Title](#)

Google Scholar: [Author Only](#) [Title Only](#) [Author and Title](#)

Nair SK, Wang N, Turuspekov Y, Pourkheirandish M, Sinsuwongwat S, Chen G, Sameri M, Tagiri A, Honda I, Watanabe Y, Kanamori H, Wicker T, Stein N, Nagamura Y, Matsumoto T, Komatsuda T. 2010. Cleistogamous flowering in barley arises from the suppression of microRNA-guided HvAP2 mRNA cleavage. *Proceedings of the National Academy of Sciences of the United States of America* 107: 490-495 DOI 10.1073/pnas.0909097107.

Pubmed: [Author and Title](#)

Google Scholar: [Author Only](#) [Title Only](#) [Author and Title](#)

Perge P, Nagy Z, Decmann A, Igaz I, Igaz P. 2017. Potential relevance of microRNAs in inter-species epigenetic communication, and implications for disease pathogenesis. *RNA Biology*. 14: 391-401 DOI 10.1080/15476286.2016.1251001.

Pubmed: [Author and Title](#)

Google Scholar: [Author Only](#) [Title Only](#) [Author and Title](#)

Pirro S, Minutolo A, Galgani A, Potesta M, Colizzi V, Montesano C. 2016. Bioinformatics prediction and experimental validation of microRNAs involved in cross-kingdom interaction. *The Journal of Computational Biology* 23: 976-989 DOI 10.1089/cmb.2016.0059.

Pubmed: [Author and Title](#)

Google Scholar: [Author Only](#) [Title Only](#) [Author and Title](#)

Pogue AI, Clement C, Hill JM, Lukiw WJ. 2014. Evolution of microRNA (miRNA) structure and function in plants and animals: relevance to aging and disease. *Journal of Aging Science* 2: 1-12 DOI 10.4172/2329-8847.1000119.

Pubmed: [Author and Title](#)

Google Scholar: [Author Only](#) [Title Only](#) [Author and Title](#)

**Redis RS, Calin S, Yang Y, You MJ, Calin GA. 2012. Cell-to-cell miRNA transfer:**

**from body homeostasis to therapy. *Pharmacology & Therapeutics* 136:169–174**

**DOI 10.1016/j.pharmthera.2012.08.003.**

Rutter BD, Innes RW. 2018. Extracellular vesicles as key mediators of plant–microbe interactions. *Current Opinion in Plant Biology* 44: 16-22 DOI 10.1016/j.pbi.2018.01.008.

Pubmed: [Author and Title](#)

Google Scholar: [Author Only](#) [Title Only](#) [Author and Title](#)

Stephen Y, Snow J. 2017. Formidable challenges to the notion of biologically important roles for dietary small RNAs in ingesting mammals. *Genes and Nutrition* 12: 13 DOI 10.1186/s12263-017-0561-7.

Pubmed: [Author and Title](#)

Google Scholar: [Author Only](#) [Title Only](#) [Author and Title](#)

**Thery C, Zitvogel L, Amigorena S. 2002. Exosomes: composition, biogenesis and**

**function. *Nature Reviews Immunology* 2:569–579 DOI 10.1038/nri855.**

**Valadi H, Ekström K, Bossios A, Sjöstrand M, Lee JJ, Lötvall JO. 2007. Exosome-mediated transfer of mRNAs and microRNAs is a novel mechanism of genetic**

**exchange between cells. *Nature Cell Biology* 9:654–659 DOI 10.1038/ncb1596.**

Pubmed: [Author and Title](#)

Google Scholar: [Author Only](#) [Title Only](#) [Author and Title](#)

van der Grein SG, Nolte-'t Hoen EN. 2014. "Small Talk" in the Innate Immune System via RNA-Containing Extracellular Vesicles. *Frontiers in Immunology* 5: 542 DOI 10.3389/fimmu.2014.00542.

Pubmed: [Author and Title](#)

Google Scholar: [Author Only](#) [Title Only](#) [Author and Title](#)

Vaucheret H, Chupeau Y. 2012. Ingested plant miRNAs regulate gene expression in animals. *Cell Research* 1: 3-5 DOI 10.1038/cr.2011.164.

Pubmed: [Author and Title](#)

Google Scholar: [Author Only](#) [Title Only](#) [Author and Title](#)

Wagner AE, Piegholdt S, Ferraro M, Pallauf K, Rimbach G. 2015. Food derived microRNAs. *Food & Function* 6: 714-718 DOI 10.1039/c4fo01119h.

Pubmed: [Author and Title](#)

Google Scholar: [Author Only](#) [Title Only](#) [Author and Title](#)

Wang Yo, Li L, Tang Sh, Liu J, Zhang H, Zhi H, Jia G, Diao X. 2016. Combined small RNA and degradome sequencing to identify miRNAs

and their targets in response to drought in foxtail millet. *BMC Genomics* 17: 57 DOI 10.1186/s12863-016-0364-7.

Pubmed: [Author and Title](#)

Google Scholar: [Author Only Title Only Author and Title](#)

Xiao J, Feng S, Wang X, Long K, Luo Y, Wang Y, Ma J, Tang Q, Jin L, Li X, Li M. 2018. Identification of exosome-like nanoparticle-derived microRNAs from 11 edible fruits and vegetables. *PeerJ* 6: e5186 DOI 10.7717/peerj.5186.

Pubmed: [Author and Title](#)

Google Scholar: [Author Only Title Only Author and Title](#)

Xie W, Weng A, Melzig MF. 2016. MicroRNAs as new bioactive components in medicinal plants. *Planta Medica* 82: 1153-1162. DOI 10.1055/s-0042-108450.

Pubmed: [Author and Title](#)

Google Scholar: [Author Only Title Only Author and Title](#)

Yurikova OY, Aisina DE, Niyazova RE, Atambayeva SA, Labeit S, Ivashchenko AT. 2019. The Interaction of miRNA-5p and miRNA-3p with the mRNAs of Orthologous Genes. *Mol Biol (Mosk)* 53: 692-704 DOI 10.1134/S0026898419040189.

Pubmed: [Author and Title](#)

Google Scholar: [Author Only Title Only Author and Title](#)

Zempleni J, Aguilar-Lozano A, Sadri M, Sukreet S, Manca S, Wu D, Zhou F, Mutai E. 2017. Biological Activities of Extracellular Vesicles and Their Cargos from Bovine and Human Milk in Humans and Implications for Infants. *The Journal of Nutrition* 147: 3-10 DOI 10.3945/jn.116.238949.

Pubmed: [Author and Title](#)

Google Scholar: [Author Only Title Only Author and Title](#)

Zhang L, Chen T, Yin Yo, Zhang Ch, Zhang Yo. 2019. Dietary microRNA-A Novel Functional Component of Food. *Advances in Nutrition* 10: 711-721. DOI 10.1093/advances/nmy127.

Pubmed: [Author and Title](#)

Google Scholar: [Author Only Title Only Author and Title](#)

Zhang L, Hou D, Chen X, Li D, Zhu L, Zhang Y, Li J, Bian Z, Liang X, Cai X, Yin Y, Wang C, Zhang T, Zhu D, Zhang D, Xu J, Chen Q, Ba Y, Liu J, Wang Q, Chen J, Wang J, Wang M, Zhang Q, Zhang J, Zen K, Zhang CY. 2012. Exogenous plant MIR168a specifically targets mammalian LDLRAP1: evidence of cross-kingdom regulation by microRNA. *Cell Research* 22: 107-126 DOI 10.1038/cr.2011.158.

Pubmed: [Author and Title](#)

Google Scholar: [Author Only Title Only Author and Title](#)

Zhang H, Li Y, Liu Y, Liu H, Wang H, Jin W, Zhang Y, Zhang C, Xu D. 2016. Role of plant microRNA in cross-species regulatory networks of humans. *BMC Systems Biology* 10: 1-10 DOI 10.1186/s12918-016-0292-1.

Pubmed: [Author and Title](#)

Google Scholar: [Author Only Title Only Author and Title](#)

Zhao Q, Liu Yu, Zhang N, Hu M, Zhang H, Joshi T, Xu D. 2018. Evidence for plant-derived xenomiRs based on a large-scale analysis of public small RNA sequencing data from human samples. *PLOS One* 13: 6 DOI 10.1371/journal.pone.0187519.

Pubmed: [Author and Title](#)

Google Scholar: [Author Only Title Only Author and Title](#)

ZhaoY, Cong L, Lukiw WJ. 2018. Plant and animal microRNAs (miRNAs) and their potential for interkingdom communication. *Cellular and Molecular Neurobiology* 38: 133-140 DOI 10.1007/s10571-017-0547-4.

Pubmed: [Author and Title](#)

Google Scholar: [Author Only Title Only Author and Title](#)

Zhou Z, Li X, Liu J, Dong L, Chen Q, Liu J, Kong H, Zhang Q, Qi X, Hou D, Zhang L, Zhang G, Liu Y, Zhang Y, Li J, Wang J, Chen X, Wang H, Zhang J, Chen H, Zen K, Zhang CY. 2015. Honeysuckle-encoded atypical microRNA2911 directly targets influenza A viruses. *Cell research* 1: 39-49 DOI 10.1038/cr.2014.130.

Pubmed: [Author and Title](#)

Google Scholar: [Author Only Title Only Author and Title](#)
